# Supplementary material
Source: PubMed Central journal article supplement (PMC2830814)

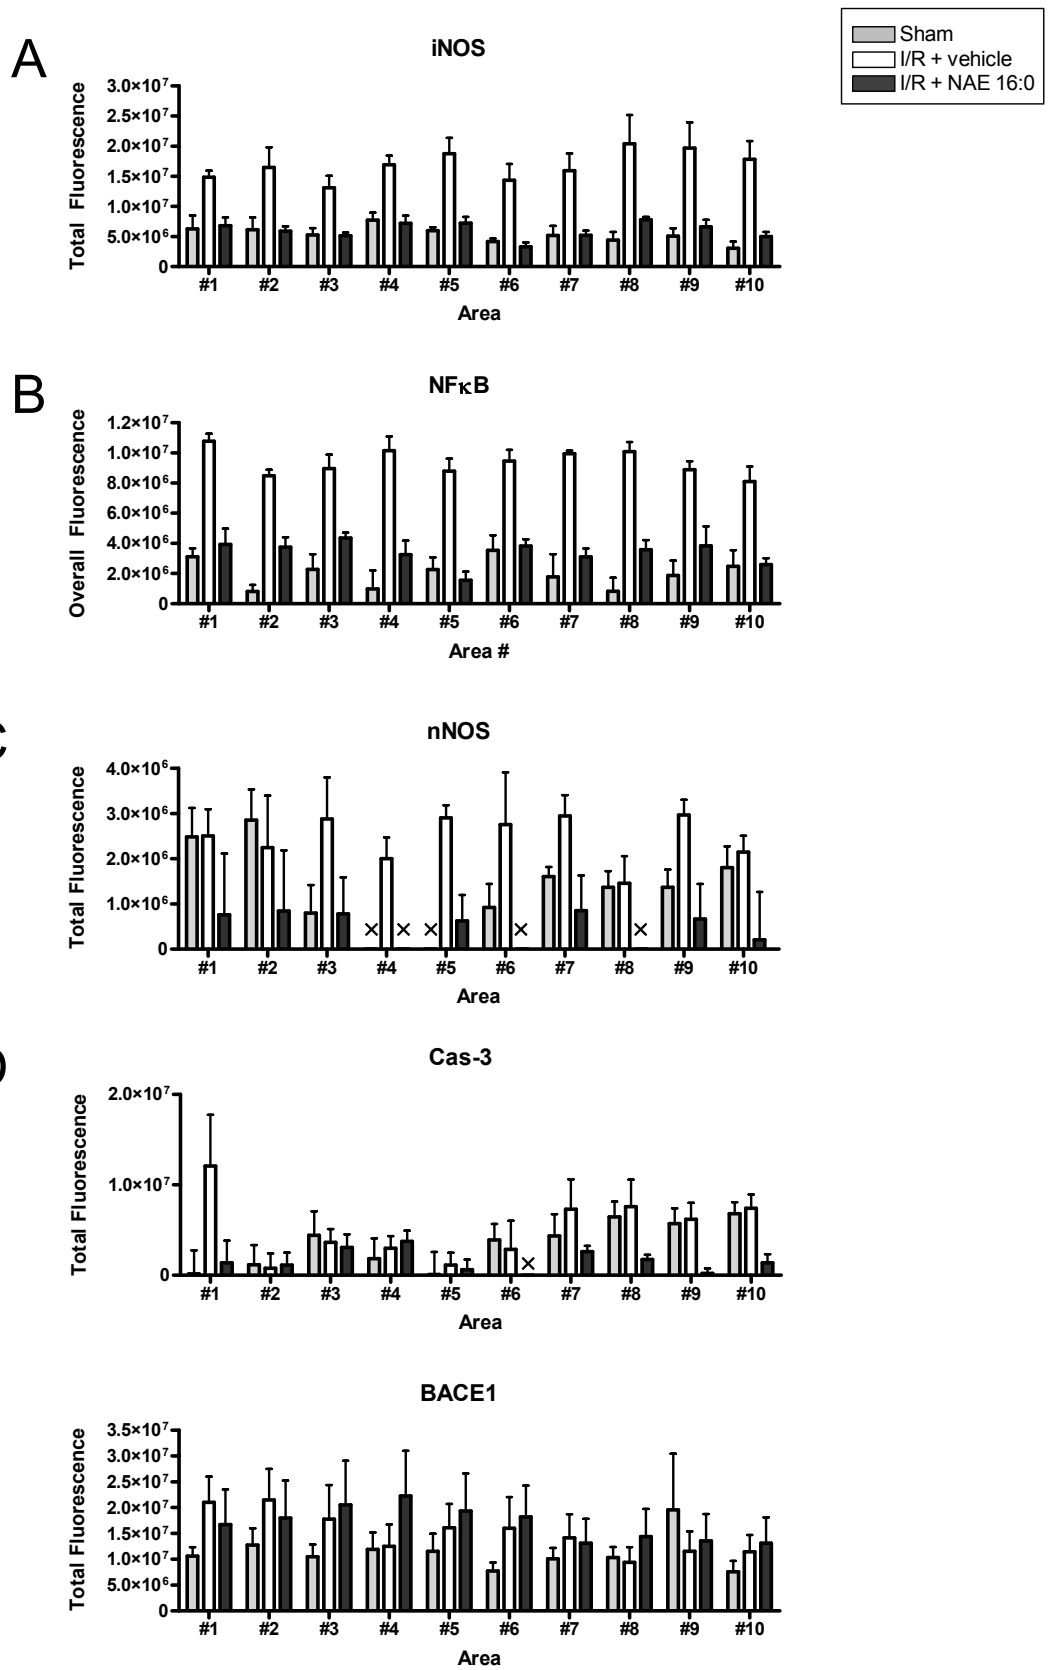

**Supplemental Figure 1**  
 Garg *et al.*

Supplement: NIHMS167874-supplement-01.pdf [file NIHMS167874-supplement-01.pdf]
